# Supplementary material for: Engineering N-acyl-homoserine lactone-based quorum-sensing circuit for dynamic regulatory control in Saccharomyces cerevisiae
Source: Research Square preprint supplement (doi:10.21203/rs.3.rs-6620198/v1), 2025-06-02
Supplement: Supplementary file 1 [file b7173b126046dd3de08c8050.docx]

**Supplementary materials**

**
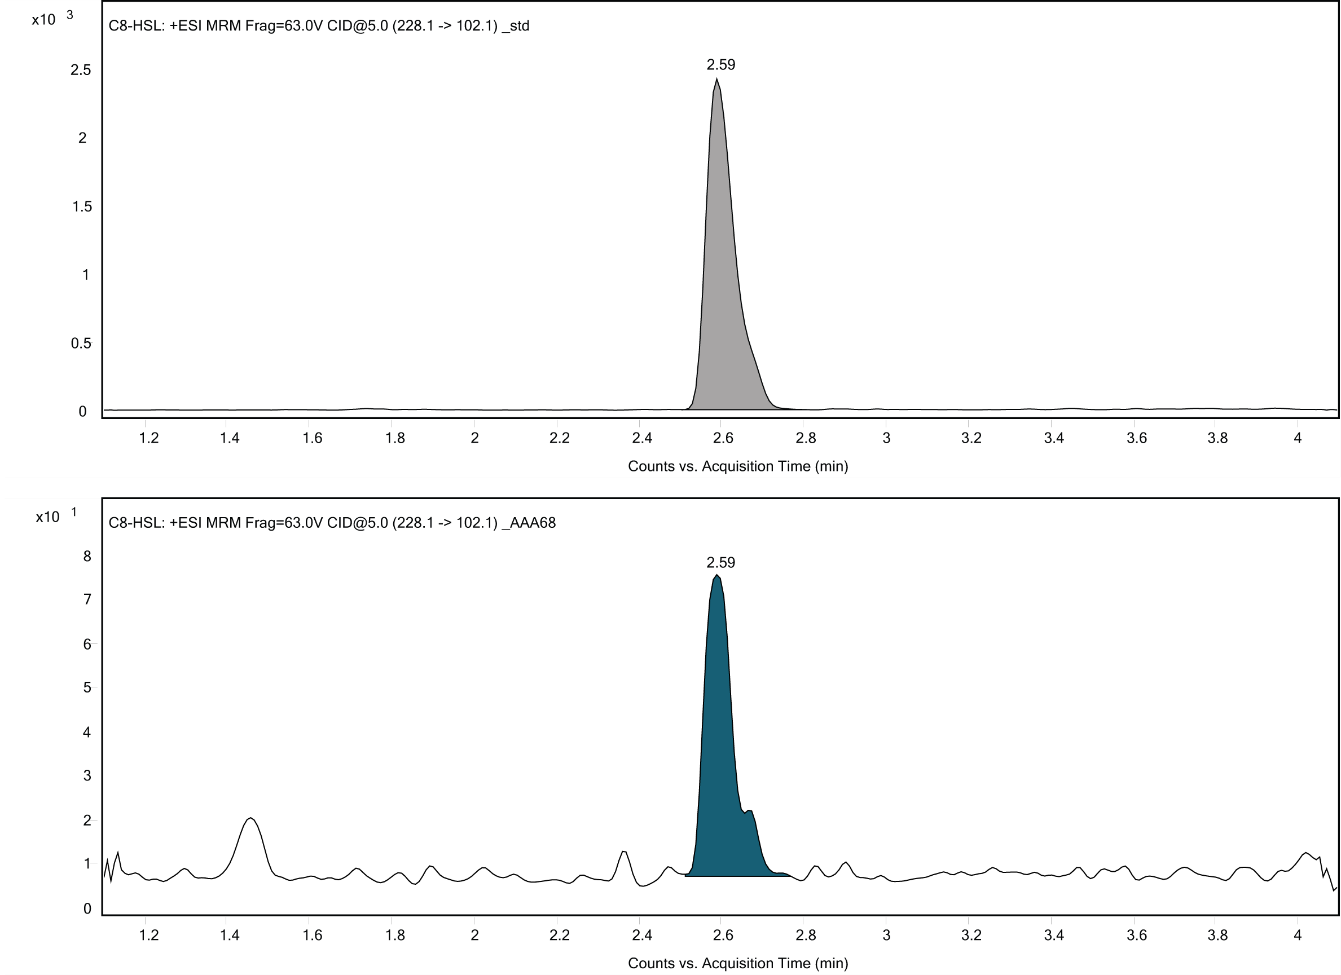
**

**Figure S1: production of C8-HSL established in yeast.** *S. cerevisiae* strain AAA068 (*Bc.cepI*), grown for 24 hours on synthetic complete (SC) medium. LC-MS-chromatogram of experimental sample (bottom) compared to standard C8-HSL (top), C8-HSL eluted at a retention time of 2.6 min. Representative data of biological duplicates and 3 technical replicates of the standard are shown.


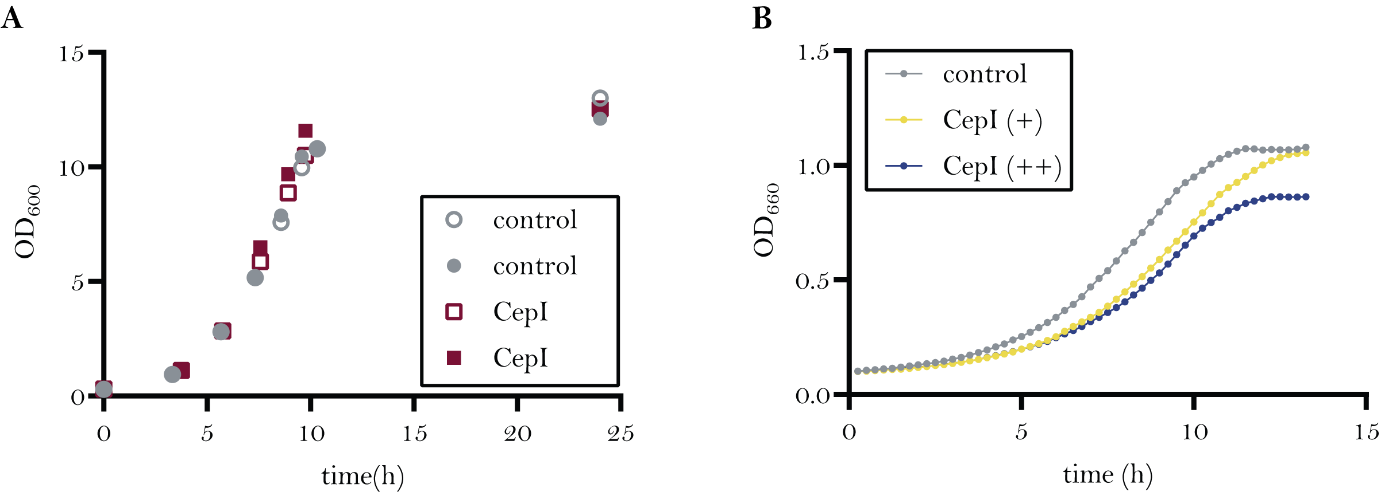


**Figure S2: growth of C8-HSL producing yeast strains. (A)** Duplicate cultures of *S. cerevisiae* strains CEN.PK2-1C (control), AAA068 (CepI), were grown in aerobic shakeflasks on synthetic complete (SC) medium at 30°C and growth was analysed by manual OD600 measurements. (B) Strains CEN.PK2-1C (control), AAA068 (CepI), AAA113 (CepI (+)) and AAA111 (CepI (++)) grown on fed-batch medium with supplementation of methionine, growth monitored by OD660 measurements in plate reader. Representative data of biological triplicate cultures are shown.


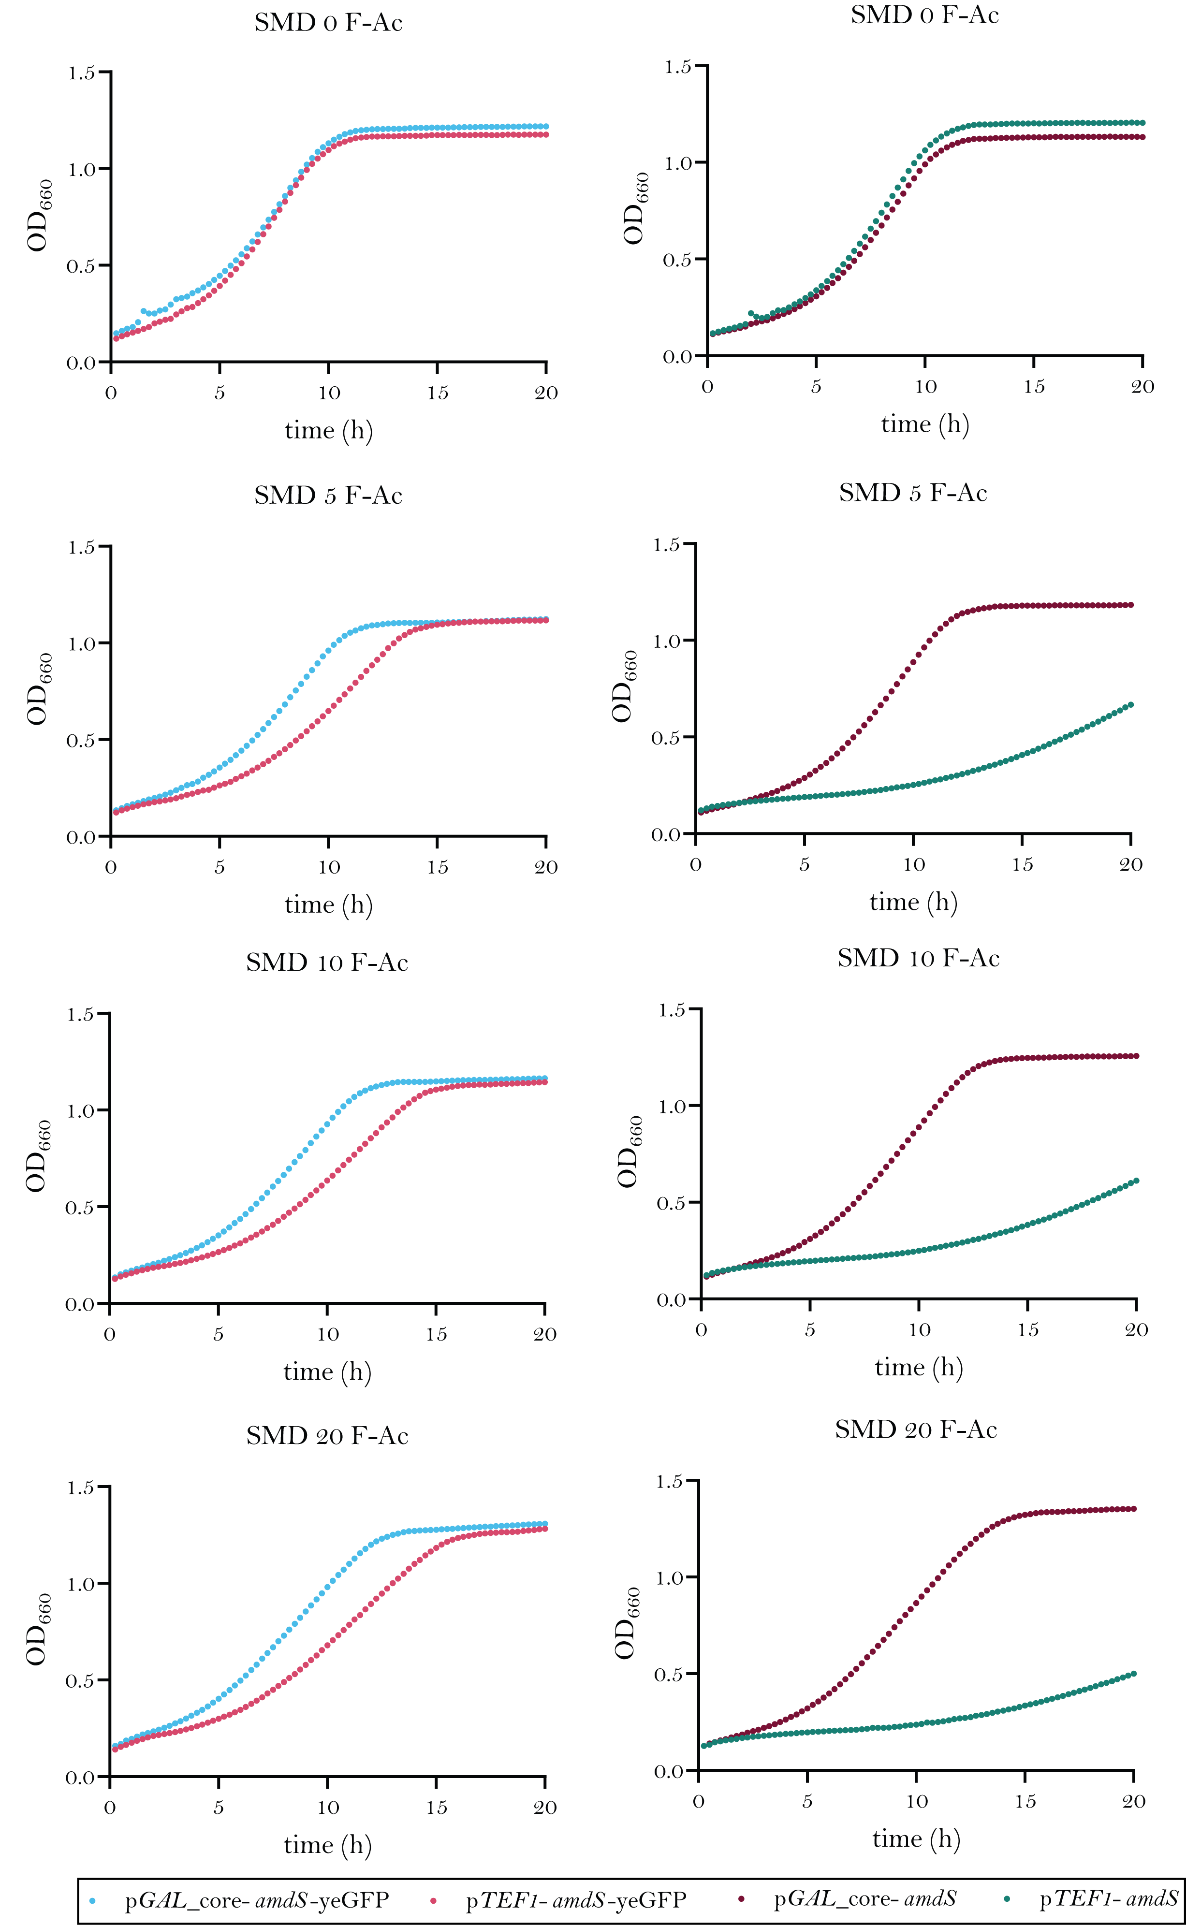


**Figure S3: Testing different concentrations of fluoro-acetamide for counter-selection medium.** Growth curves of aerobic batch cultures of *S. cerevisiae* strains expressing *amdS-*yeGFP from a minimal *GAL*-core promoter equipped with 5x*luxO* (blue) (ACA007; *pGAL1_core-5xluxO-amdS-yeGFP*) or from the strong p*TEF1* (pink) (ACA013; *pTEF1-amdS-yeGFP*) (left panels) and strains expressing *amdS* from a minimal *GAL*-core promoter equipped with 5xluxO (red) (ACA004; *pGAL1_core-5xluxO-amdS*) or from the strong p*TEF1* (green) (ACA002; *pTEF1-amdS*) (right panels) on counter-selection medium; ie. SMD supplemented with different concentrations of fluoro-acetamide (F-Ac). Growth measurements were obtained by a plate reader and representative data of triplicate cultures are shown.


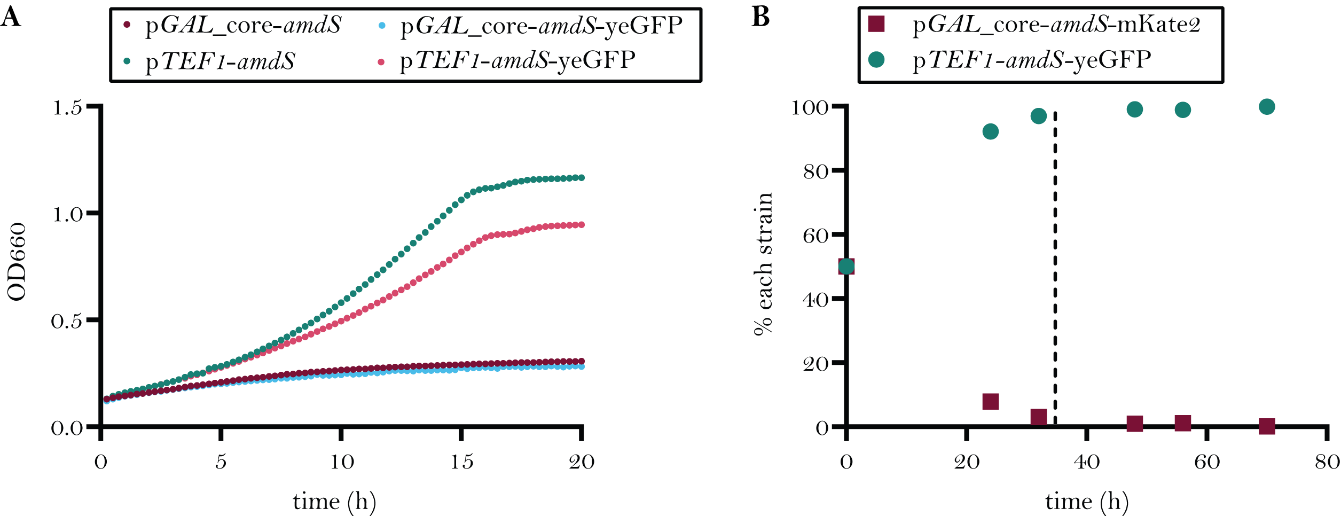


**Figure S4: Testing *S. cerevisiae* strains with different expression levels of *amdS* and fusion *amdS* in selection medium.** (A)Growth curves of batch cultures of *S. cerevisiae* strains expressing *amdS-*yeGFP from a minimal *GAL*-core promoter equipped with 5xluxO (blue) (ACA007; *pGAL1_core-5xluxO-amdS-yeGFP*) or from the strong p*TEF1* (pink) (ACA013; *pTEF1-amdS-yeGFP*) and strains expressing *amdS* from a minimal *GAL*-core promoter equipped with 5xluxO (red) (ACA004; *pGAL1_core-5xluxO-amdS*) or from the strong p*TEF1* (green) (ACA002; *pTEF1-amdS*) on selection medium; ie. SMD without nitrogen source supplemented with acetamide. Growth measurements were obtained by a plate reader and representative data of triplicate cultures are shown. (B) Strains ACA013 (p*TEF1*-amdS-yeGFP) and ACA008 (p*GAL*_core-amdS-mCherry) were co-cultured with a starting ratio of 1:1 on selection medium. Abundance of each strain was determined by flow cytometric analysis. The dotted line indicates 1:100 dilution in fresh counter selection medium. Experiment was performed in duplicate, mean and standard deviation of the mean are shown.


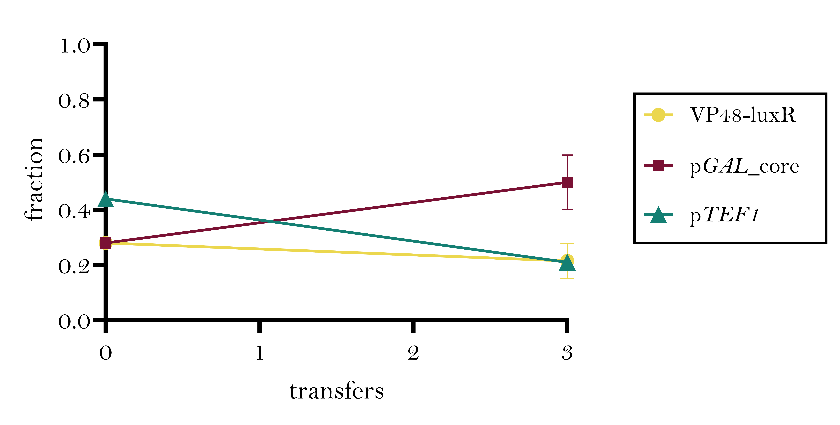


**Figure S5:** **Determining abundance of *S. cerevisiae* strains with different expression levels of *amdS* after 3 consecutive transfers on non-selective medium**. Mixture of *S. cerevisiae* strains expressing *amdS* from a minimal *GAL*-core promoter equipped with 5x*luxO* (red) (ACA004), from the strong p*TEF1* (green) (ACA002) and from a minimal *GAL*-core promoter equipped with 5x*luxO* controlled by VP48-LuxR (yellow) (ACA019) were grown on non-selective (ie. SMD) medium for 3 consecutive transfers. The abundance of each strain was determined using colony PCR of 24-32 single colonies at the start of the experiment and after 3 transfers. Experiment was performed in duplicate, and mean values and standard deviation of the mean are shown.


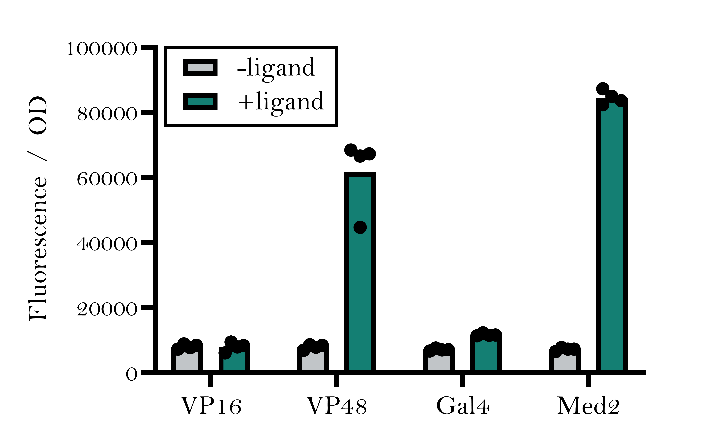


**Figure S6: Testing different activation domains N-terminally fused to LuxR*.*** *S. cerevisiae* strains AAA105 (p*GAL1*_5x*luxO*-yeGFP + VP16-*luxR*), AAA036 (p*GAL1*_5xluxO-yeGFP + VP48-LuxR), AAA101 (p*GAL1*_5x*luxO*-yeGFP + Gal4_AD-LuxR) and AAA103 (p*GAL1*_5x*luxO*-yeGFP + Med2-LuxR) were grown on SC-complete medium with and without ligand (5 µM 3-oxo-C6-HSL) and analysed in fluorescence plate reader. Average of 3 consecutive measurements after 6 hours of growth were used to determine the fluorescence normalized to OD for each biological replicate. Experiment was performed with 4 replicates.


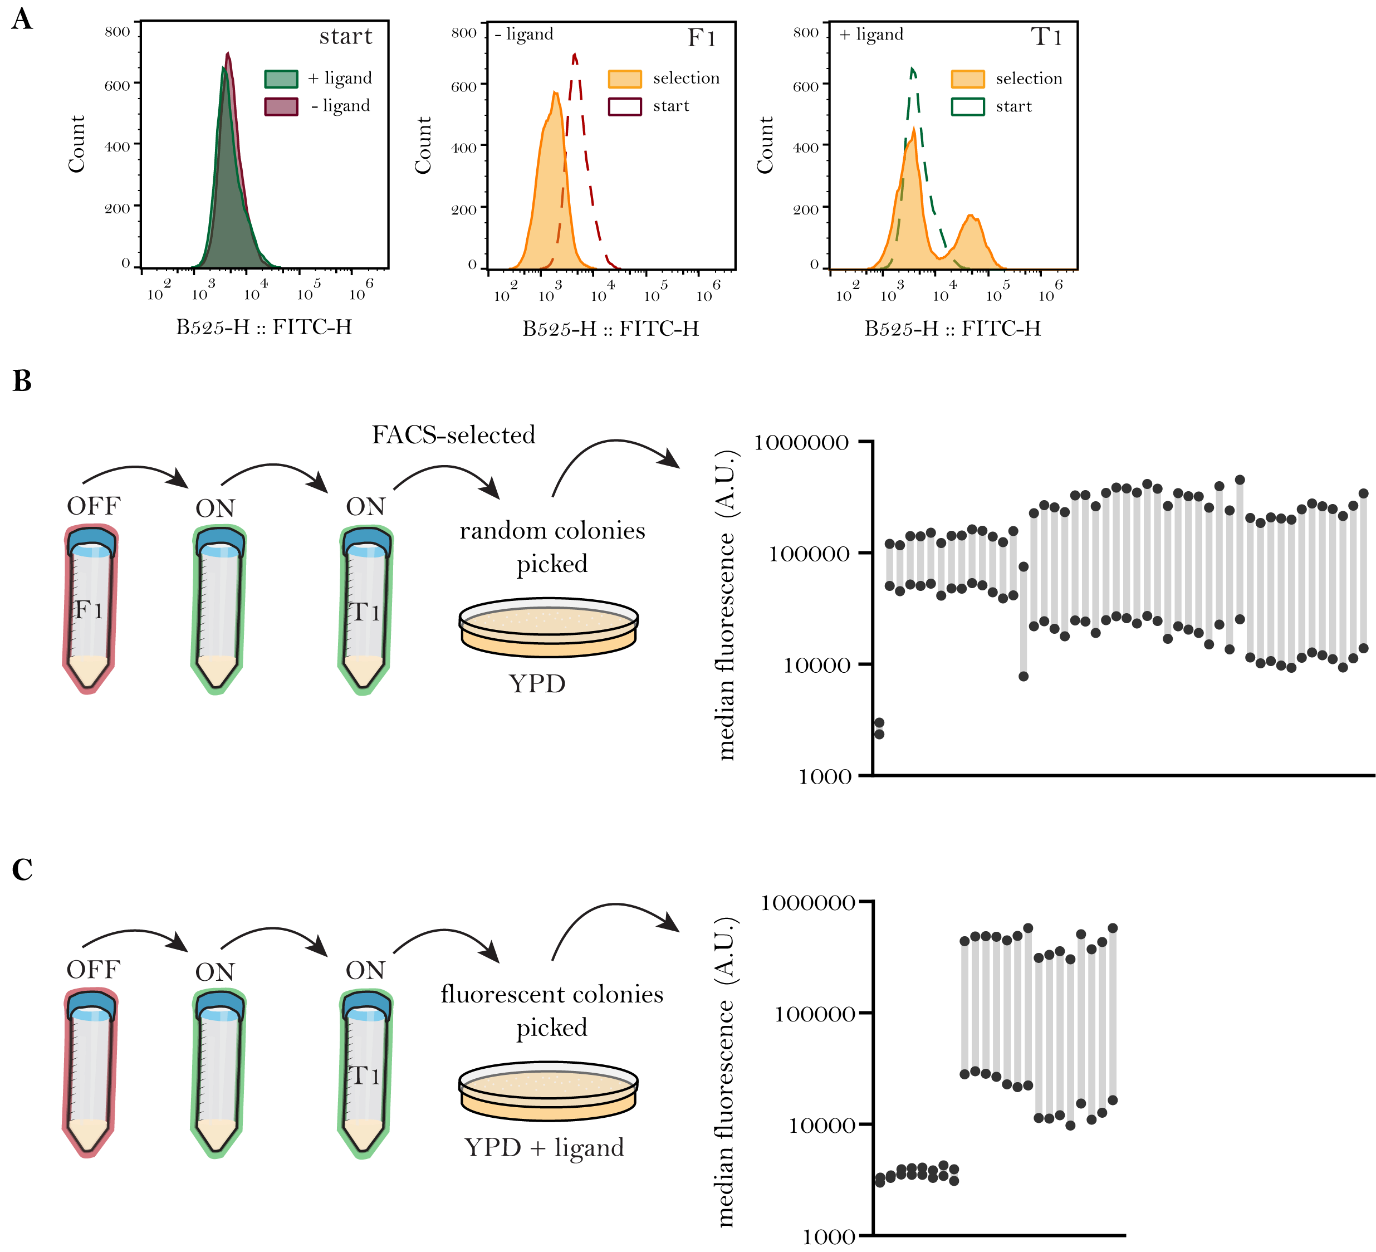


**Figure S7: analysis of single mutants enriched using counter-selection medium and selection medium, followed by FACS-sorting or manual selection using plates.** The mutant library was obtained by integrating a pool of *GAL4*_AD-*luxR*-variants into a yeast strain that already contained *amdS* and yeGFP controlled by p*GAL*_core_5xLuxO. Mutant library was grown on transformation selection media SC -HIS +NAT for 3 days to select transformants (start population), after which cells were transferred to counter-selection media and grown for 1 day (OFF) (population F1). Subsequently, cells were transferred twice on selection media, containing 50 nM C8-HSL (population T1). Fluorescence of all consecutive cultures were analysed using flow cytometer following 6 hours of growth on SC with and without 50 nM C8-HSL (A). The 7% most fluorescent cells from culture T1 were sorted and plated for single colonies. 48 single colonies were analysed on the flow cytometer after growing with and without ligand, to determine the dynamic range (B). Dilutions of culture T1 was plated on YPD supplemented with 50 nM C8-HSL and grown for 24 hours. 24 single colonies were selected from the plate, based on fluorescence, and analysed on the flow cytometer after growing with and without ligand, to determine the dynamic range (C). A.U.: arbitrary units.


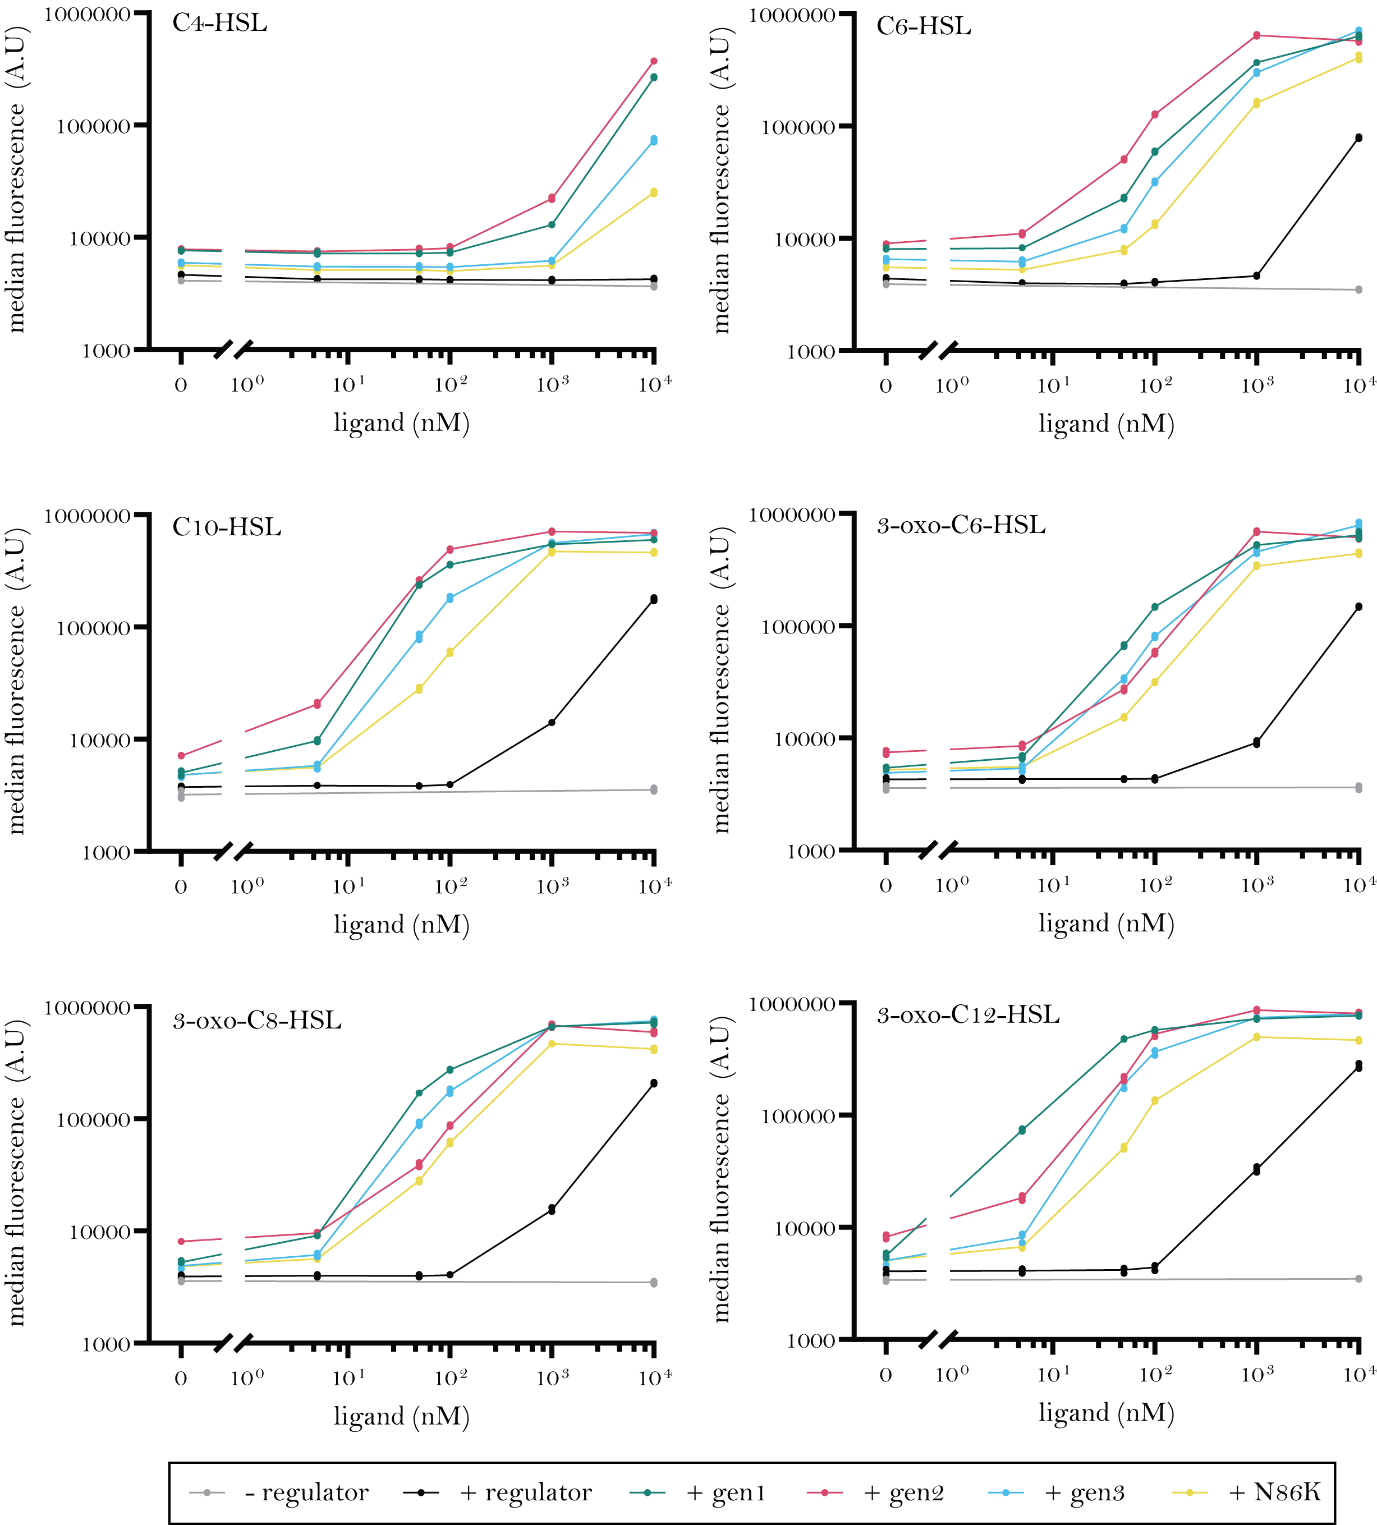


**Figure S8: Characterization of Gal4-LuxR-mutants.** Dose-response curves of yeGFP fluorescence levels 6 hours following supplementation of 0-10,000 nM of C4-HSL, C6-HSL, C10-HSL, 3-oxo-C6-HSL, 3-oxo-C8-HSL and 3-oxo-C12-HSL, respectively. Tested for *S. cerevisiae* strains AAA036 (- regulator), AAA101 (+ regulator), AAA151 (+ gen1), AAA150 (+ gen2), AAA149 (+ gen3), AAA107 (+ N86K), performed with three biological replicates. A.U.: arbitrary units.


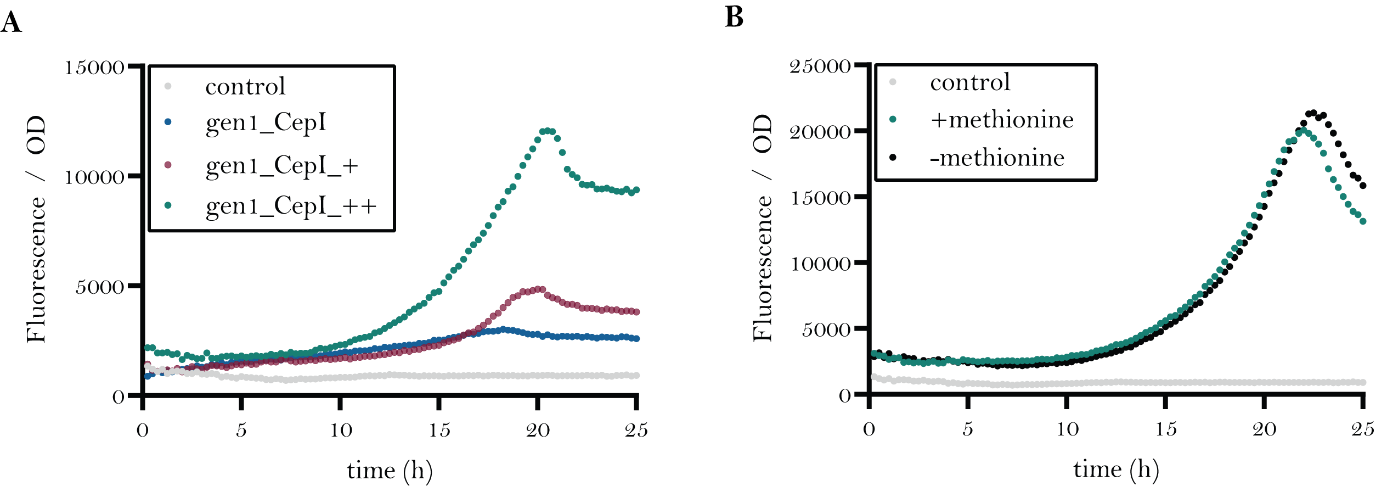


**Figure S9: QS-controlled expression of yeGFP in different yeast backgrounds and on different medium compositions.** (A)Fluorescence normalized to OD on fed-batch medium to analyse yeGFP of different *S. cerevisiae* strainsin fluorescence plate reader.Where indicated, strains expressa *Bc.cepI* expression cassette alone (AAA168; gen1_CepI) or with an overexpression cassette for *Sc.SAM2* and *Sc.MET6* . For the upregulation of *SAM2* and *MET6*, either an expression cassette was introduced driven by p*ACT1* and p*PGI1* (AAA169; gen1_CepI (+)) or driven by p*TEF1* and p*PGK1* (AAA151; gen1_CepI (++)). All strains contain yeGFP cassette regulated by Gal4_AD-LuxR_gen1. (B) Strain AAA151 (gen1_CepI (++)) grown on fed-batch medium with and without supplementation of methionine. Representative data of biological triplicate cultures are shown.


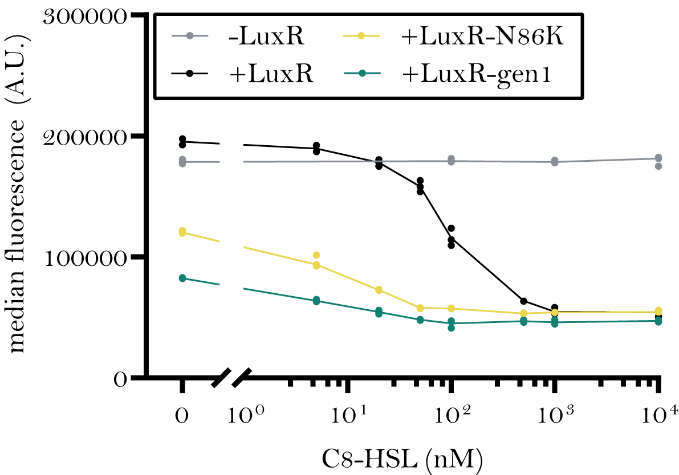


**Figure S10: Dose-response curves of LuxR driving the expression of yeGFP behind p*TEF1* with 2x luxO sequence inserted downstream of the TATA-box (p*TEF1*_2xluxO).** Dose-response curves of yeGFP fluorescence following a 24 hours pre-incubation with 5-10,000 nM C8-HSL prior to transfer to fresh medium with supplementation for 6 hours with 5-10,000 nM C8-HSL. Tested for *S. cerevisiae* strains AAA164 (-luxR), AAA165 (+luxR), performed with three biological replicates. A.U.: arbitrary units.


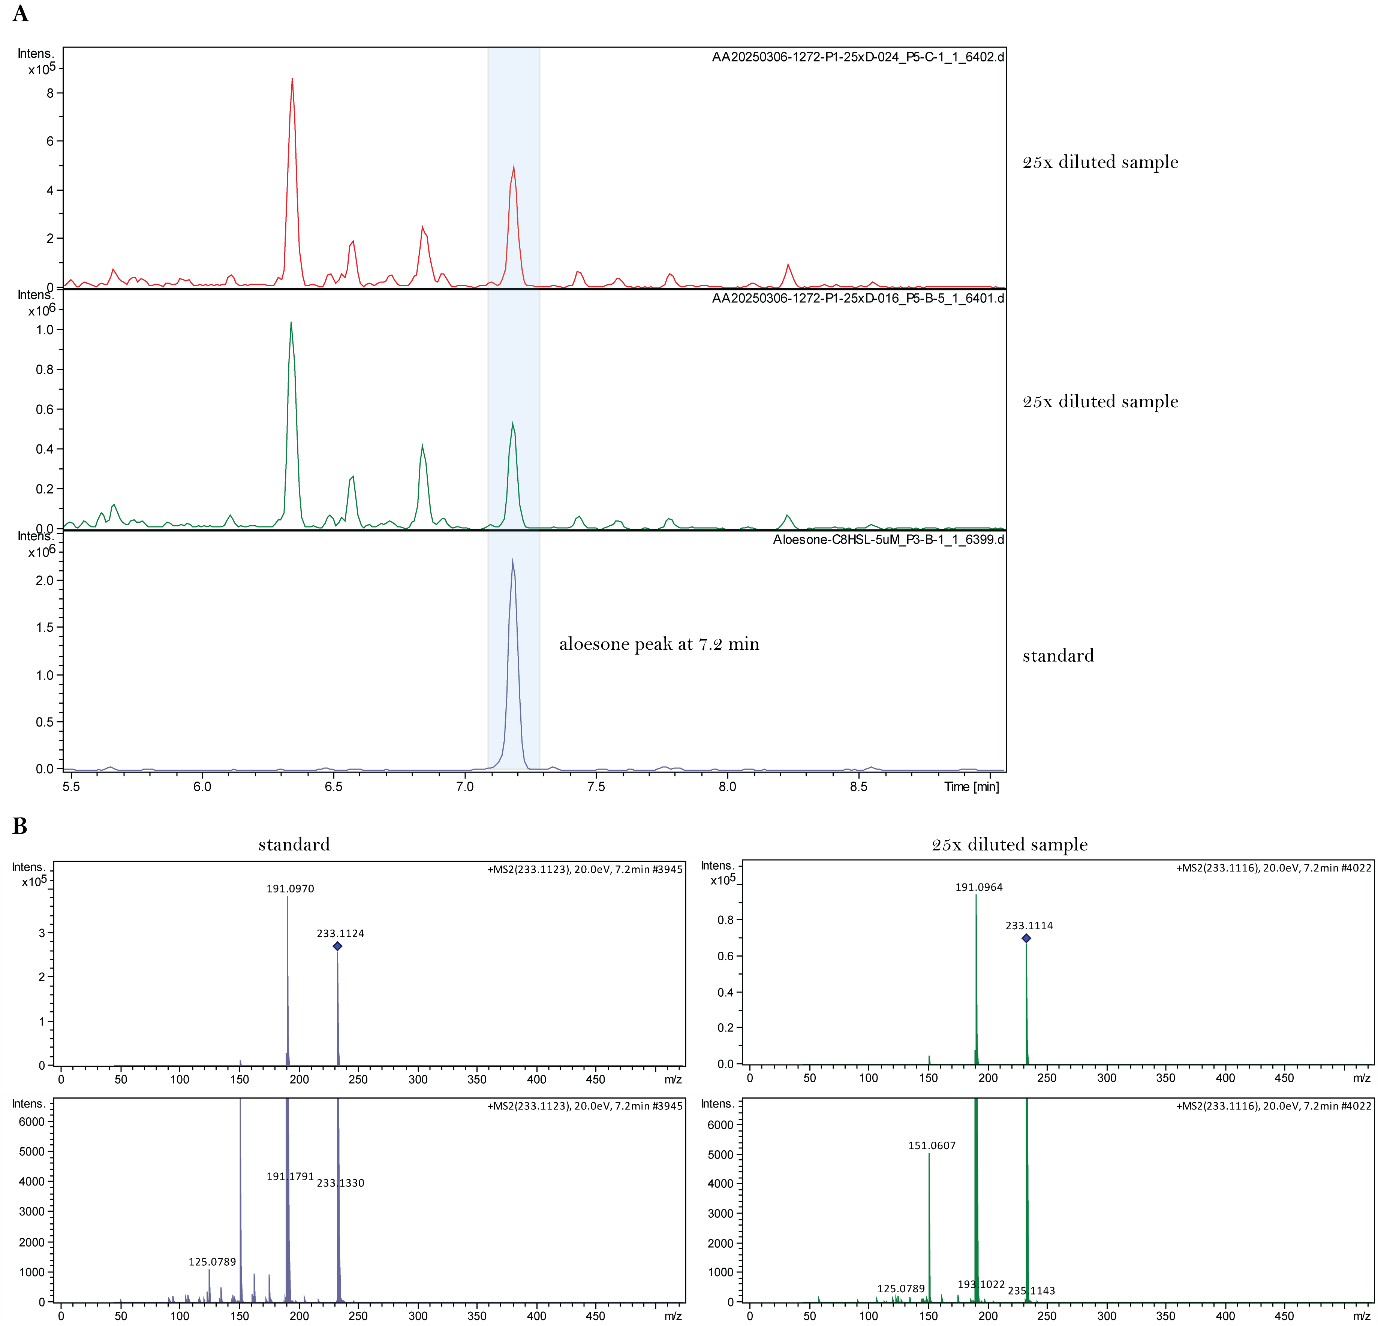


**Figure S11: aloesone peak at 7.2 min and MS2 fragmentation pattern.** (A) LC-MS chromatogram of 25 times diluted representative samples from end-point determination of aloesone production in aerobic fed-batch cultivation performed in flowerplates analysed by biolector, compared to aloesone standard. Aloesone eluted at a retention time of 7.2 min. (B) MS/MS fragmentation spectra of aloesone (m/z 233.1) acquired at 7.2 min using electrospray ionization in positive mode on a QTOF mass spectrometer at 20 eV collision energy. Major fragment ions include m/z 191.1 (loss of C2H4O), 151.1 (loss of C4H6O) and 125.1 (further fragmentation), supporting identification of aloesone. Spectra shown from both 25 times diluted experimental sample and aloesone standard.


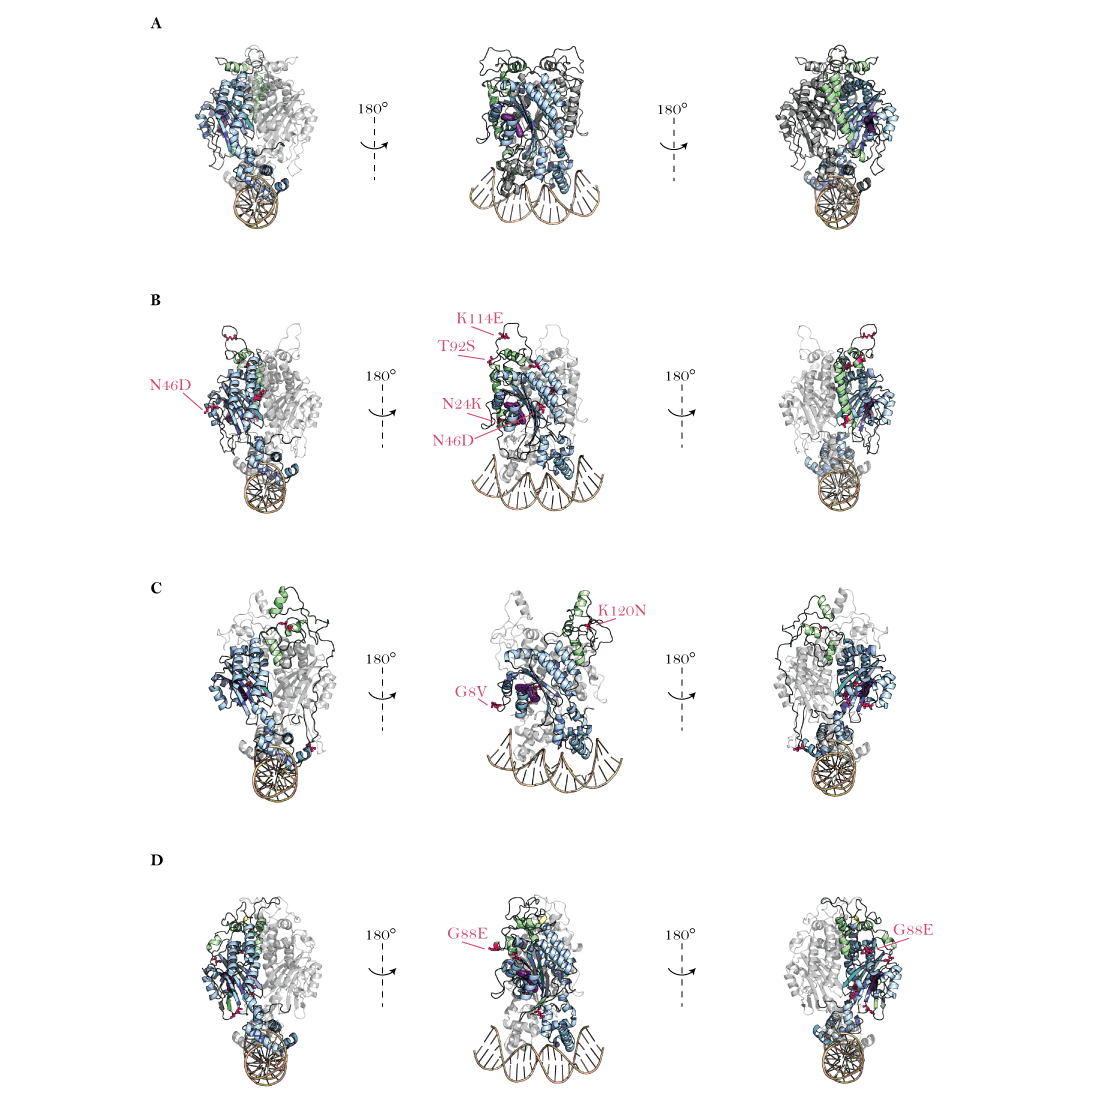


**Figure S12: Predicted protein structures of Gal4_AD-NLS-LuxR and mutants.** Alphafold3 (42) predicted protein structure of (A) Gal4_AD-NLS-LuxR (B) and structural mapping of mutations found in gen1 , (C) gen2 and (D) gen 3 in Gal4-NLS-LuxR. Mutated residues are highlighted in pink and specific mutations in Gal4_AD and NLS are indicated. Gal4_AD is shown in lightblue and LuxR in green, dimer is shown in grey.


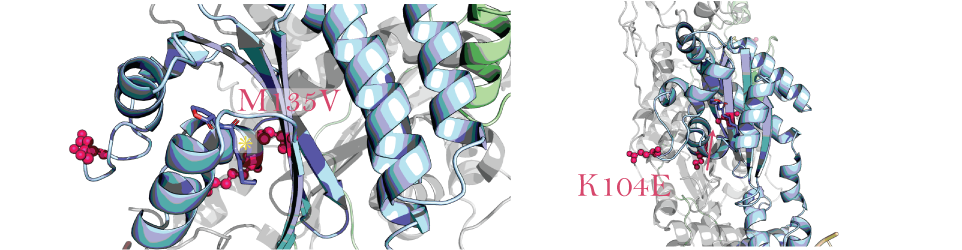


**Figure S13: Analysis of protein ligand interaction of LuxR_gen2 with C8-HSL.** LuxR_gen2-mutations are shown in pink, asterisk (*) denotes the carbon position that would bear a 3-oxo-group in 3-oxo-C8-HSL and arrow indicates the tunnel entrance of the ligand.

**Table S1: overview of primers used in this study to create linear repair fragments for genomic integrations**

| **name** | **target** | **sequence** |
| --- | --- | --- |
| AA73 | pPGK1_ep_fw | GATCATCAAGGAAGTAATTATCTACTTTTTACAACAAATATAAAACAACCTGCACTAAAACAATG |
| AA74 | pPGK1_fw | GGTCTTTTCTAATTCGTAGTTTTTCAAGTTCTTAGATGCTTTCTTTTTCTCTTTTTTACAGATCATCAAGGAAGTAATTATCTACTTTTT |
| AA75 | pPGK1_rv | CATTGTTTTAGTGCAGGTTGTTTTATATTTG |
| AA76 | X-4_UP_fw | CCCAAAGCTAAGAGTCCCATT |
| AA77 | tADH1_ep_rv | AATCATAAATCATAAGAAATTCGCTTATTTAGAAGTGTCAACAACGTATCTACATCTGTCCT |
| AA78 | tADH1_rv | CTAAGAGTCACTTTAAAATTTGTATACACTTATTTTTTTTATAACTTATTTAATAATAAAAATCATAAATCATAAGAAATTCGCTTATTT |
| AA79 | tADH1_fw | AGGACAGATGTAGATACGTTGTTG |
| AA80 | X-4_DN_rv | CTGGTGAGGATTTACGGTATGATC |
| AA153 | luxR_N86K_rv | GAATGATTAGACTTGGAGTAATCAACGATTGGGTCG |
| AA154 | luxR_N86K_fw | CGTTGATTACTCCAAGTCTAATCATTCTCCCATCAACTGG |
| AA164 | pFAS1_pTEF1_fw | GCCCGTGCACCCACGGCTCCTCGGAGGCCGGGTTATAGCAGCGTCTGCTCCGCATCACGATACACGAGGTGCAGGCAGCACACACCATAGCTTCAAAATG |
| AA167 | FAS1_rv | TGGTACCAGAAGCACGTGCTCTAAAGAACCGTGAGATAGGGTTAATGGTCTTGTGGAGTAAGCGTCCATTGTTTTAGTGCAGGTTTGTAATTAAAACTTA |

**Table S2: overview of primers used in this study to create plasmids using USER-cloning**

| **name** | **target** | **sequence** |
| --- | --- | --- |
| AA1 | cepI_fw | ACCTGCACUAAAACAATGCAAACTTTTGTTCATGAAGAAGGTAG |
| AA2 | cepI_rv | ATCTGTCCUTGAAGCAGCAATAGCTTGTCTAGC |
| AA9 | lasI_fw | ACCTGCACUAAAACAATGATTGTTCAGATTGGCCGTCG |
| AA10 | lasI_rv | ATCTGTCCUTTAGGAAACGGCCAGGCG |
| AA13 | luxI_fw | ACCTGCACUAAAACAATGACTATAATGATAAAAAAATCGGATTTTTTGGC |
| AA14 | luxI_rv | ATCTGTCCUTTAATTTAAGACTGCTTTTTTAAACTGTTCATTAATAG |
| AA15 | luxR_fw | ACCTGCACUAAAACAATGGAAAACATCAACGCTGATGACAC |
| AA16 | luxR_rv | ATCTGTCCUTTAATTCTTAAAGTATGGACAATCAATAGCACC |
| AA17 | VP48_fw | ACCTGCACUAAAACAATGCCAGCCGATGCTTTG |
| AA34 | pTEF1_fw | AGTGCGAUGCACACACCATAGCTTCAAAATG |
| AA35 | pTEF1_rv | AGTGCAGGUTTGTAATTAAAACTTAGATTAGATTGCTATGCTTTC |
| AA36 | pGAL_core_fw | AGTGCGAUAAAACTGTATTATAAGTAAACTGAAAAAGCGTG |
| AA37 | pGAL_core_rv | AGTGCAGGUGTCGACGCTAGCTATAGTTTTTTCTCC |
| AA81 | amdS_fw | ACCTGCACUAAAACAATGCCACAATCTTGGGAAGAATTGG |
| AA82 | G43S_amdS_rv | ATGCTAGCUGATCCGCCCCCACCAGACCCACCTCCGCCAGAGCCTCCACCCCCTTATGGAGTAACAACGTTACCCAAC |
| AA83 | G43S_mKate2_fw | AGCTAGCAUGGTTTCTGAACTCATCAAGGAAAAC |
| AA85 | G43S_yeGFP_fw | AGCTAGCAUGTCTAAAGGTGAAGAATTATTCACTGG |
| AA86 | mKate2_rv | ATCTGTCCUTTATCTGTGTCCCAACTTAGATGGC |
| AA93 | pACT1_rv | ACCTGCACUTGTTAATTCAGTAAATTTTCGATCTTGGGAAG |
| AA95 | pPGI1_rv | ATGACAGAUTTTTAGGCTGGTATCTTGATTCTAAATCG |
| AA103 | esaI_co_fw | ACCTGCACUAAAACAATGTTGGAGTTGTTCGATGTCTCC |
| AA104 | esaI_co_rv | ATCTGTCCUTTAAACTGGTAAAGTCAATGGCCAAG |
| AA105 | lasI_co_fw | ACCTGCACUAAAACAATGATCGTCCAAATCGGTAGAAGAG |
| AA106 | lasI_co_rv | ATCTGTCCUTTAAGAAACGGCCAATCTTTGTTCAAC |
| AA107 | luxI_co_fw | ACCTGCACUAAAACAATGACCATCATGATCAAGAAGTCCG |
| AA108 | luxI_co_rv | ATCTGTCCUTTAGTTCAAAACGGCCTTCTTGAATTG |
| AA121 | amdS_rv | ATCTGTCCUTTATGGAGTAACAACGTTACCCAAC |
| AA129 | pACT1_fw | ATCGCACUGAAGCGGGTAAGCTGCCAC |
| AA130 | pPGI1_fw | AGTGCGAUAGAGAATTTTGCCATCGGACATGCTACCTTACGC |
| AA131 | SAM2_fw | AGTGCAGGUAAAACAATGTCCAAGAGCAAAACTTTCTTATTTAC |
| AA132 | SAM2_rv | CGTGCGAUTTAAAATTCCAATTTCTTTGGTTTTTCCC |
| AA135 | NLS1_luxR_fw | AGCCAGGUCCACCAAAAAAGAAG |
| AA136 | NLS1_GAL4_AD_rv | ACCTGGCUCTTTTTTTGGGTTTGGTGGGG |
| AA137 | GAL4_AD_fw | ACCTGCACUAAAACAATGGCCAATTTTAATCAAAGTGGGAATATTGC |
| AA138 | NLS2_luxR_fw | ACCAGGUCCACCAAAAAAGAAG |
| AA139 | NLS2_MED2_rv | ACCTGGUATATTGAAGCCGCTGAGGTCTAATTC |
| AA140 | MED2_fw | ACCTGCACUAAAACAATGGTAGTACAAAATAGCCCAGTTTCGTC |
| AA141 | VP16_fw | ACCTGCACUAAAACAATGCCAGCAGACGCATTGGATGAC |
| AA144 | pTEF1_fw | ATCGCACUGCACACACCATAGCTTCAAAATG |
| AA145 | pTEF1_rv | ACCTGCACUTTGTAATTAAAACTTAGATTAGATTGCTATGCTTTC |
| AA161 | MET6_fw | ATCTGTCAUAAAACAATGGTTCAATCTGCTGTCTTAGGG |
| AA162 | MET6_rv | CACGCGAUTTAATTCTTGTATTGTTCACGGAAGTACTTG |
| MAD3 | BB_fw | ATCGCAUATCGCACGCATTCCATGCGA |
| MAD4 | BB_rv | ACCGCGTUATCGCGTACCAATTCGCCC |
| MAD12 | yeGFP_fw | ACCTGCACUAAAACAATGTCTAAAGGTGAAGAATTATTC |
| MAD13 | yeGFP_rv | ATCTGTCCUTTATTTGTACAATTCATCC |
| MAD14 | tCPS1_fw | AGGACAGAUGCGCAATGATTGAATAGTC |
| MAD15 | tCPS1_rv | AACGCGGUGTGGTTTTGATTTGATTTAAGTC |
| MAD36 | pPGK1_fw | AGTGCGAUAGACGCGAATTTTTCGAAGAAG |
| MAD37 | pPGK1_rv | AGTGCAGGUTGTTTTATATTTGTTGTAAAAAGTAGATAATTAC |
| MAD38 | pTDH3_fw | AGTGCGAUCTATTTTCGAGGACCTTGTCACC |
| MAD39 | pTDH3_rv | AGTGCAGGUTTTGTTTGTTTATGTGTGTTTATTCG |
| MAD61 | tCYC1_rv | AACGCGGUCTTCGAGCGTCCCAAAACCTTCTC |
| MAD62 | tCYC1_fw | AGGACAGAUATCCGCTCTAACCGAAAAGG |
| MAD63 | tADH1_fw | AGGACAGAUGTAGATACGTTGTTGACACTTC |
| MAD64 | tADH1_rv | AACGCGGUGAGCGACCTCATGCTATACC |

**Table S3**: **overview of plasmids used in this study**

| **name** | **relevant genotype** | **details plasmid construction** | **source** |
| --- | --- | --- | --- |
| pTAJAK-161 | Cas9, HIS | - | (73) |
| pCfB3045 | XI-3 gRNA, NAT | - | (69) |
| pCfB6915 | XI-3 gRNA, URA | - | (74) |
| pCfB3042 | X-4 gRNA, NAT | - | (69) |
| pCfB6912 | X-4 gRNA, URA |  | (74) |
| pCfB9340 | VIII-1 gRNA, NAT | - | (75) |
| pCfB3050 | XII-5 gRNA, NAT | - | (69) |
| pCfB3020 | X-2 gRNA, NAT | - | (69) |
| pCfB6910 | X-2 gRNA, URA | - | (74) |
| pCfB2904 | XI-3 USER overhangs | **-** | (69) |
| pCfB3035 | X-4 USER overhangs | **-** | (69) |
| pCfB2909 | XII-5 USER overhangs | **-** | (69) |
| pCfB2899 | X-2 USER overhangs | **-** | (69) |
| pCfB9359 | VIII-1 USER overhangs | **-** | (75) |
| pAvA001 | cepI (codon-optimized) | Synthesized by IDT | This study |
| LuxTA2-4F | VP48-NLS-luxR | Ordered from addgene | (31) |
| pLuxO5 | pGAL_core-5xluxO | Ordered from addgene | (31) |
| pLas81-LuxI (#73445) | luxI | Ordered from addgene | (24) |
| pLux76-LasI (#73444) | lasI | Ordered from addgene | (24) |
| pAC-EsaR-EsaI (#47660) | esaI | Ordered from addgene | (29) |
| pAvA026 | XI-3-pGAL1-5xLuxO-yeGFP-tCPS1 | USER-cloning | This study |
| pAvA027 | X-4-pPGK1-luxR-tADH1 | USER-cloning | This study |
| pAvA028 | X-4-pPGK1-VP48-NLS-luxR-tADH1 | USER-cloning | This study |
| pAvA030 | X-2-pTDH3-luxI-tCYC1 | USER-cloning | This study |
| pAvA031 | X-2-pTDH3-lasI-tCYC1 | USER-cloning | This study |
| pAvA045 | X-2-pTDH3-esaI-tCYC1 | USER-cloning | This study |
| pAvA055 | XI-3-pTEF-amdS-yeGFP-tCPS1 | USER-cloning | This study |
| pAvA061 | XI-3-pGAL_core-5xluxO-amdS-yeGFP-tCPS1 | USER-cloning | This study |
| pAvA063 | XI-3-pGAL_core-5xluxO-amdS-mKate2-tCPS1 | USER-cloning | This study |
| pAvA068 | X-2-pTDH3-cepI (co)- tCYC | USER-cloning | This study |
| pAvA071 | esaI (codon-optimized) | Synthesized by Thermo Scientific | This study |
| pAvA073 | lasI (codon-optimized) | Synthesized by Thermo Scientific | This study |
| pAvA074 | luxI (codon-optimized) | Synthesized by Thermo Scientific | This study |
| pAvA078 | X-2-pTDH3-luxI (co)-tCYC1 | USER-cloning | This study |
| pAvA079 | X-2-pTDH3-esaI (co)-tCYC1 | USER-cloning | This study |
| pAvA080 | X-2-pTDH3-lasI (co)-tCYC1 | USER-cloning | This study |
| pAvA085 | XI-3-pTEF1-amdS-tCPS1 | USER-cloning | This study |
| pAvA087 | XI-3-pGAL_core-5xluxO-amdS-tCPS1 | USER-cloning | This study |
| pAvA096 | PKS3 (codon-optimized) | Synthesized by Thermo Scientific | This study |
| pAvA098 | p*TEF1*_luxO_105 | Synthesized by Thermo Scientific | This study |
| pAvA100 | XII-5-pPGK1-Aa.PKS3 (co)-tCYC | USER-cloning | This study |
| pAvA102 | XI-3-pTEF_luxO_105-yeGFP-tCPS1 | USER-cloning | This study |
| pAvA103 | X-4-pPGK1-GAL4_AD-NLS-luxR-tADH1 | USER-cloning | This study |
| pAvA105 | X-4-pPGK1-MED2-NLS-luxR-tADH1 | USER-cloning | This study |
| pAvA107 | X-4-pPGK1-VP16-NLS-luxR-tADH1 | USER-cloning | This study |
| pAvA109 | XI-3-p*TEF1*_LuxO_105-FAS1-tCPS1 | USER-cloning |  |
| pAvA117 | XII-5-pGAL_core-5xluxO-yeGFP-tCPS1 | USER-cloning | This study |
| pAvA118 | XII-5-tADH1-SAM2-p*TEF1*--pPGK1-MET6-tCYC1 | USER-cloning | This study |
| pAvA119 | XII-5-tADH1-SAM2-pACT1--pPGI1-MET6-tCYC1 | USER-cloning | This study |
| pAvA125 | gRNA_pFAS1 | USER-cloning | This study |
| pAvA134 | XI-3-p*TEF1*_2xLuxO_98_105-eGFP-tCPS1 | USER-cloning |  |
| pAvA139 | X-4-pPGK1-[GAL4_AD-NLS-LuxR]_gen1-tADH1 | USER-cloning | This study |
| pAvA141 | X-4-pPGK1-[GAL4_AD-NLS-LuxR]_gen2-tADH1 | USER-cloning | This study |
| pAvA143 | X-4-pPGK1-[GAL4_AD-NLS-LuxR]_gen3-tADH1 | USER-cloning | This study |
| pAvA155 | VIII-1-tADH1-SAM2-p*TEF1*--pPGK1-MET6-tCYC1 | USER-cloning | This study |

**Table S4**: **overview of yeast strains used in this study and which plasmids were used**

| **name** | **relevant genotype** | **details strain construction** | **source** |
| --- | --- | --- | --- |
| CEN.PK2-1C | *MAT*-a *ura3 his3 leu2 trp1* | - |  |
| CEN.PK110-10C | *MAT*-α *URA3 his3 LEU2 TRP1* | - |  |
| AAA001 | *p-Cas9* | CEN.PK2-1C: pTAJAK-161 |  |
| AAA010 | *MAT*-a *ura3 his3 leu2 trp1 XI-3-pGAL1-5xLuxO-yeGFP-tCPS1 p-Cas9* | AAA001: pCfB6915 + NotI digested pAvA026 | This study |
| AAA019 | *MAT*-a *ura3 his3 leu2 trp1 XI-3-pGAL_core-5xLuxO-yeGFP-tCPS1* | AAA010: plasmids removed | This study |
| AAA036 | *MAT*-a *ura3 his3 leu2 trp1 XI-3-pGAL1_core-5xLuxO-yeGFP-tCPS1 X-4-pPGK1-VP48-NLS-luxR-tADH1* | AAA010: pCfB3042 + NotI digested pAvA028 | This study |
| AAA062 | *MAT*-a *ura3 his3 leu2 trp1* *X-2-pTDH3-cepI (co)-tCYC p-Cas9* | AAA001: pCfB3020 + NotI digested pAvA068 |  |
| AAA063 | *MAT*-a *ura3 his3 leu2 trp1 X-2-pTDH3-cepI (co)-tCYC* | AAA062: plasmids removed |  |
| AAA093 | *XII-5-pPGK1-AaPKS3_co-tCYC, pCas9* | AAA001: pCfB3050 + NotI digested pAvA100 | This study |
| AAA095 | *MAT*-a *ura3 his3 leu2 trp1* *XI-3-pTEF_LuxO-yeGFP-tCPS1 p-Cas9* | AAA001: pCfB6915 + NotI digested pAvA102 | This study |
| AAA096 | *MAT*-a *ura3 his3 leu2 trp1 XI-3-pTEF_LuxO-yeGFP-tCPS1* | AAA095: plasmids removed | This study |
| AAA101 | *MAT*-a *ura3 his3 leu2 trp1 XI-3-pGAL1_core-5xLuxO-yeGFP-tCPS1 X-4-pPGK1-GAL4_AD-NLS-LuxR-tADH1* | AAA010: pCfB3042 + NotI digested pAvA103 | This study |
| AAA103 | *MAT*-a *ura3 his3 leu2 trp1 XI-3-pGAL1_core-5xLuxO-yeGFP-tCPS1 X-4-pPGK1-MED2-NLS-LuxR-tADH1* | AAA010: pCfB3042 + NotI digested pAvA105 | This study |
| AAA105 | *MAT*-a *ura3 his3 leu2 trp1 XI-3-pGAL1_core-5xLuxO-yeGFP-tCPS1 X-4-pPGK1-VP16-NLS-LuxR-tADH1* | AAA010: pCfB3042 + NotI digested pAvA107 | This study |
| AAA107 | *MAT*-a *ura3 his3 leu2 trp1 XI-3-pGAL1_core-5xLuxO-yeGFP-tCPS1 X-4-pPGK1-GAL4_AD-NLS-LuxR_N86K-tADH1* | AAA010: pCfB3042 + X-4-pPGK1-GAL4_AD-NLS-luxR_N86K + luxR_N86K-tADH1 | This study |
| AAA110 | *MAT*-a *ura3 his3 leu2 trp1* *X-2-pTDH3-cepI (co)-tCYC XII-5-tADH1-SAM2-pTEF1--pPGK1-MET6-tCYC1 p-Cas9* | AAA062: pCfb3050 + NotI digested pAvA118 | This study |
| AAA111 | *MAT*-a *ura3 his3 leu2 trp1* *X-2-pTDH3-cepI (co)-tCYC XII-5-tADH1-SAM2-pTEF1--pPGK1-MET6-tCYC1 p-Cas9* | AAA110: plasmids removed | This study |
| AAA112 | *MAT*-a *ura3 his3 leu2 trp1* *X-2-pTDH3-cepI (co)-tCYC XII-5-tADH1-SAM2-pACT1--pPGI1-MET6-tCYC1 p-Cas9* | AAA062: pCfb3050 + NotI digested pAvA119 | This study |
| AAA113 | *MAT*-a *ura3 his3 leu2 trp1* *X-2-pTDH3-cepI (co)-tCYC XII-5-tADH1-SAM2-pACT1--pPGI1-MET6-tCYC1* | AAA112: plasmids removed | This study |
| AAA134 | *MAT*-a *ura3 his3 leu2 trp1* *XII-5-pPGK1-AaPKS3_co-tCYC pFAS1::pTEF1_LuxO p-Cas9* | AA093: pAvA125 + pTEF1_luxo_105 | This study |
| AAA135 | *MAT*-a *ura3 his3 leu2 trp1* *XII-5-pPGK1-AaPKS3_co-tCYC pFAS1::pTEF1_LuxO* | AAA134: plasmids removed | This study |
| AAA148 | *MAT*-a *ura3 his3 leu2 trp1 X-2-pTDH3-CepI-co-tCYC XII-5-tADH1-SAM2-pTEF1--pPGK1-MET6-tCYC1 XI-3-pGAL_core-5xLuxO-yeGFP-tCPS1 X-4-pPGK1-GAL4_AD-NLS-luxR_N85K_tADH1* | AAA110: pCfB6915 + NotI digested pAvA026, pCfB3042 + X-4-pPGK1-GAL4_AD-NLS-luxR_N86K + luxR_N86K-tADH1 | This study |
| AAA149 | *MAT*-a *ura3 his3 leu2 trp1 X-2-pTDH3-CepI-co-tCYC XII-5-tADH1-SAM2-pTEF1--pPGK1-MET6-tCYC1 XI-3-pGAL_core-5xLuxO-yeGFP-tCPS1 X-4-pPGK1-GAL4_AD-NLS-luxR_gen3_tADH1* | AAA110: pCfB6915 + NotI digested pAvA026, pCfB3042 + NotI digested pAvA143 | This study |
| AAA150 | *MAT*-a *ura3 his3 leu2 trp1 X-2-pTDH3-CepI-co-tCYC XII-5-tADH1-SAM2-pTEF1--pPGK1-MET6-tCYC1 XI-3-pGAL_core-5xLuxO-yeGFP-tCPS1 X-4-pPGK1-GAL4_AD-NLS-luxR_gen2_tADH1* | AAA110: pCfB6915 + NotI digested pAvA026, pCfB3042 + NotI digested pAvA141 | This study |
| AAA151 | *MAT*-a *ura3 his3 leu2 trp1 X-2-pTDH3-CepI-co-tCYC XII-5-tADH1-SAM2-pTEF1--pPGK1-MET6-tCYC1 XI-3-pGAL_core-5xLuxO-yeGFP-tCPS1 X-4- pPGK1-GAL4_AD-NLS-luxR _gen1_tADH1* | AAA110: pCfB6915 + NotI digested pAvA026, pCfB3042 + NotI digested pAvA139 | This study |
| AAA156 | *MAT*-a *ura3 his3 leu2 trp1 XI-3-pGAL1_core-5xluxO-yeGFP-tCPS1 X-4-pPGK1-GAL4_AD-NLS-LuxR_gen1-tADH1* | AAA010: pCfB3042 + NotI digested pAvA139 | This study |
| AAA157 | *MAT*-a *ura3 his3 leu2 trp1 XI-3-pGAL1_core-5xluxO-yeGFP-tCPS1 X-4-pPGK1-GAL4_AD-NLS-LuxR_gen2-tADH1* | AAA010: pCfB3042 + NotI digested pAvA141 | This study |
| AAA158 | *MAT*-a *ura3 his3 leu2 trp1 XI-3-pGAL1_core-5xluxO-yeGFP-tCPS1 X-4-pPGK1-GAL4_AD-NLS-LuxR_gen3-tADH1* | AAA010: pCfB3042 + NotI digested pAvA143 | This study |
| AAA163 | *MAT*-a *ura3 his3 leu2 trp1* *XI-3-pTEF1_2xluxO_98_105-eGFP-tCPS1, p-Cas9* | AAA001: pCfB3045 + NotI digested pAvA134 | This study |
| AAA164 | *MAT*-a *ura3 his3 leu2 trp1* *XI-3-pTEF1_2xluxO_98_105-eGFP-tCPS1* | AAA163: plasmids removed | This study |
| AAA165 | *MAT*-a *ura3 his3 leu2 trp1* *XI-3-pTEF1_2xluxO_98_105-eGFP-tCPS1 X-4-pPGK1-luxR-tADH1* | AAA163: pCfB3042 + NotI digested pAvA027 | This study |
| AAA166 | *MAT*-a *ura3 his3 leu2 trp1* *XI-3-pTEF1_2xluxO_98_105-eGFP-tCPS1 X-4-pPGK1-luxR_N86K-tADH1* | AAA163: pCfB3042 + X-4-pPGK1-luxR_N86K + luxR_N86K-tADH1 | This study |
| AAA168 | *MAT*-a *ura3 his3 leu2 trp1* *X-2-pTDH3-CepI-co-tCYC, XI-3-pGAL_core-5xLuxO-yeGFP-tCPS1 X-4- pPGK1-GAL4_AD-NLS-LuxR _gen1_tADH1* | AAA062: pCfB6915 + NotI digested pAvA026, pCfB3042 + NotI digested pAvA139 | This study |
| AAA169 | *MAT*-a *ura3 his3 leu2 trp1* *X-2-pTDH3-CepI-co-tCYC XII-5-tADH1-SAM2-pACT1--pPGI1-MET6-tCYC1 XI-3-pGAL_core-5xLuxO-yeGFP-tCPS1 X-4-pPGK1-GAL4_AD-NLS-luxR_gen1_tADH1* | AAA112: pCfB6915 + NotI digested pAvA026, pCfB3042 + NotI digested pAvA139 | This study |
| AAA170 | *MAT*-a *ura3 his3 leu2 trp1* *XI-3-pTEF_luxO-eGFP-tCPS1 X-4-pPGK1-luxR-tADH1* | AAA095: pCfB3042 + NotI digested pAvA027 | This study |
| AAA171 | *MAT*-a *ura3 his3 leu2 trp1* *XI-3-pTEF_luxO-eGFP-tCPS1 X-4-pPGK1-luxR_N86K-tADH1* | AAA095: pCfB3042 + X-4-pPGK1-luxR_N86K + luxR_N86K-tADH1 | This study |
| AAA172 | *MAT*-a *ura3 his3 leu2 trp1* *XI-3-pTEF1_2xluxO_98_105-eGFP-tCPS1 X-4-pPGK1-luxR-gen1-tADH1* | AAA163: pCfB3042 + NotI digested pAvA139 | This study |
| AAA189 | *MAT*-a *ura3 his3 leu2 trp1* *X-2-pTDH3-cepI-co-tCYC XII-5-tADH1-SAM2-pTEF1--pPGK1-MET6-tCYC1 XI-3-pGAL1-5xluxO-yeGFP-tCPS1* | AAA112: pCfB6915 + NotI digested pAvA026 | This study |
| AAA198 | *MAT*-a *ura3 his3 leu2 trp1* *XII-5-pPGK1-AaPKS3_co-tCYC pFAS1::pTEF1_luxO X-2-pTDH3-CepI-tCYC p-Cas9* | AAA134: pCfB6910 + NotI digested pAvA068 | This study |
| AAA200 | *MAT*-a *ura3 his3 leu2 trp1* *XII-5-pPGK1-AaPKS3_co-tCYC pFAS1::pTEF1_luxO X-4-pPGK1-luxR_gen1-tADH1* | AAA134: pCfB3042 + NotI digested pAvA139 | This study |
| AAA202 | *MAT*-a *ura3 his3 leu2 trp1* *XII-5-pPGK1-AaPKS3_co-tCYC pFAS1::pTEF1_luxO X-2-pTDH3-CepI-tCYC pCas9 VIII-1-tADH1-SAM2-pTEF1--pPGK1-MET6-tCYC1 X-4-pPGK1-luxR_gen1-tADH1* | AAA198: pCfB9340 + NotI digested155, pCfB6912 + NotI digested pAvA139 | This study |
| AAA203 | *MAT*-a *ura3 his3 leu2 trp1* *XI-3-pTEF_luxO-eGFP-tCPS1 X-4-pPGK1-luxR_gen1-tADH1* | AAA095: pCfB3042 + NotI digested pAvA139 | This study |
| AAA206 | *MAT*-a *ura3 his3 leu2 trp1* *XII-5-pPGK1-AaPKS3_co-tCYC pFAS1::pTEF1_LuxO VIII-1-tADH1-SAM2-pTEF1--pPGK1-MET6-tCYC1* | AAA198: pCfB9340 + NotI digested155 | This study |
| ACA001 | *MAT*-α *URA3 his3 LEU2 TRP1 p-Cas9* | CEN.PK110-10C: pTAJAK-161 | This study |
| ACA002 | *MAT*-α *URA3 his3 LEU2 TRP1 XI-3-pTEF1-amdS-tCPS1 p-Cas9* | ACA001: pCfB3045 + NotI digested pAvA085 | This study |
| ACA004 | *MAT*-α *URA3 his3 LEU2 TRP1 XI-3-pGAL1_core-5xluxO-amdS-tCPS1 p-Cas9* | ACA001: pCfB3045 + NotI digested pAvA087 | This study |
| ACA007 | *MAT*-α *URA3 his3 LEU2 TRP1 XI-3-pGAL1_core-5xluxO-amdS-yeGFP-tCPS1 p-Cas9* | ACA001: pCfB3045 + NotI digested pAvA061 | This study |
| ACA008 | *MAT*-α *URA3 his3 LEU2 TRP1 XI-3-pGAL1_core-5xluxO-amdS-mKate2-tCPS1 p-Cas9* | ACA001: pCfB3045 + NotI digested pAvA063 | This study |
| ACA013 | *MAT*-α *URA3 his3 LEU2 TRP1 XI-3-pTEF1-amdS-yeGFP-tCPS1 p-Cas9* | ACA001: pCfB3045 + NotI digested pAvA055 | This study |
| ACA015 | *MAT*-α *URA3 his3 LEU2 TRP1 XI-3-pGAL1_core-5xluxO-amdS-tCPS1 XII-5-pGAL1_core-5xluxO-yeGFP-tCPS1 p-Cas9* | ACA007: pCfB3050 + NotI digested pAvA117 | This study |
| ACA019 | *MAT*-α *URA3 his3 LEU2 TRP1 XI-3-pGAL1_core-5xluxO-amdS-tCPS1* | ACA004: pCfB3042 + NotI digested pAvA028 |  |
| ACA030L | *MAT*-α *URA3 his3 LEU2 TRP1 XI-3-pGAL1_core-5xluxO-amdS-tCPS1 XII-5-pGAL1_core-5xluxO-yeGFP-tCPS1* *library X-4-pPGK1-GAL4_AD-NLS-luxR-tADH1, p-Cas9* | ACA015: pCfB3042 + X-4-pPGK1 + GAL4_AD-luxR (library) + tADH1-X-4 | This study |

**Table S5**: **Codon optimized DNA sequences of synthases and sequence of pTEF1_luxO_105.** The luxO operator sequence is underlined.

| CepI | ATGCAAACTTTTGTTCATGAAGAAGGTAGATTGCCACATGAATTGGCTGCTGATTTGGGTAGATATAGAAGAAGAGTTTTTGTTGAACAATTGGGTTGGGCTTTGCCATCTGCTAATGAATCTTTTGAAAGAGATCAATTTGATAGAGATGATACTGTTTATGTTTTTGCTAGAAATGCTGATGGTGATATGTGTGGTTGTGCTAGATTGTTGCCAACTACTAGACCATATTTGTTGAAATCTTTGTTTGCTGATTTGGTTGCTGAAGATATGCCATTGCCACAATCTGCTGCTGTTTGGGAATTGTCTAGATTTGCTGCTACTGATGATGAAGGTGGTCCAGGTAATGCTGAATGGGCTGTTAGACCAATGTTGGCTGCTGTTGTTGAATGTGCTGCTCAATTGGGTGCTAGACAATTGATTGGTGTTACTTTTGCTTCTATGGAAAGATTGTTTAGAAGAATTGGTATTCATGCTCATAGAGCTGGTCCACCAAAACAAGTTGATGGTAGATTGGTTGTTGCTTGTTGGATTGATATTGATCCACAAACTTTTGCTGCTTTGGGTATTGAACCAGGTCAAGCTGCTAGACAAGCTATTGCTGCTTCATAA |
| --- | --- |
| EsaI | ATGTTGGAGTTGTTCGATGTCTCCTACGAAGAATTGCAAACTACTAGATCTGAAGAGTTG  TACAAGCTGAGGAAAAAGACCTTCTCTGATAGATTAGGTTGGGAAGTTATTTGCTCCCAA  GGTATGGAATCTGATGAATTTGATGGTCCAGGTACTAGGTACATTTTGGGTATTTGTGAA  GGTCAATTGGTTTGCTCTGTTAGGTTCACTTCTTTGGATAGACCAAACATGATTACCCAT  ACCTTCCAACACTGTTTCTCTGATGTTACTTTGCCAGCTTATGGCACTGAATCTTCTAGA  TTCTTTGTTGATAAGGCTAGAGCTAGAGCTTTGTTGGGTGAACATTATCCAATCTCTCAA  GTTTTGTTCTTGGCCATGGTTAATTGGGCTCAAAACAATGCTTACGGTAACATCTACACC  ATCGTTTCAAGAGCCATGTTGAAGATTTTGACAAGATCTGGTTGGCAGATCAAGGTTATC  AAAGAAGCTTTCTTGACCGAGAAAGAGAGGATCTATTTGTTGACATTGCCAGCTGGTCAA  GATGACAAACAACAATTAGGTGGTGATGTTGTTTCTAGAACTGGTTGTCCACCAGTTGCT  GTTACTACTTGGCCATTGACTTTACCAGTTTAA |
| LasI | ATGATCGTCCAAATCGGTAGAAGAGAAGAGTTCGACAAAAAGTTGTTGGGTGAAATGCAT  AAGTTGAGAGCCCAGGTTTTCAAAGAAAGAAAAGGTTGGGATGTTTCCGTCATCGACGAA  ATGGAAATTGATGGTTATGATGCCTTGTCTCCCTACTACATGTTGATTCAAGAAGATACT  CCAGAGGCTCAAGTTTTTGGTTGTTGGAGAATTTTTGATACCACCGGTCCATATATGCTG  AAGAATACTTTCCCAGAACTGTTGCATGGTAAAGAAGCACCTTGTTCTCCACATATTTGG  GAATTGTCTAGATTCGCCATTAACTCTGGTCAAAAAGGTTCTTTGGGTTTCTCTGATTGC  ACTTTGGAAGCTATGAGAGCTTTGGCTAGATACTCCTTGCAAAACGATATTCAAACCTTG  GTTACTGTTACCACTGTTGGTGTTGAAAAGATGATGATTAGAGCCGGTTTGGATGTCTCT  AGATTTGGTCCACATTTGAAGATCGGTATTGAAAGAGCTGTTGCCTTGAGAATTGAATTG  AACGCTAAAACCCAAATCGCCTTGTATGGTGGTGTTTTGGTTGAACAAAGATTGGCCGTT  TCTTAA |
| LuxI | ATGACCATCATGATCAAGAAGTCCGATTTCTTGGCTATTCCATCTGAAGAGTACAAGGGT  ATCTTGTCCTTGAGATACCAAGTGTTCAAGCAAAGATTGGAATGGGACTTAGTTGTCGAA  AACAACTTGGAATCCGATGAGTACGATAATTCTAACGCTGAGTATATCTACGCCTGTGAT  GATACTGAAAACGTTTCTGGTTGTTGGAGATTATTGCCAACTACTGGTGATTACATGCTG  AAGTCTGTTTTTCCAGAACTGTTGGGTCAACAATCTGCTCCAAAAGATCCAAACATCGTC  GAATTGTCTAGATTCGCTGTTGGTAAGAACTCCTCCAAGATTAACAATTCCGCTTCCGAA  ATTACCATGAAGTTGTTCGAAGCCATCTACAAACATGCTGTTTCTCAAGGTATTACCGAA  TACGTTACTGTTACCTCTACCGCCATTGAAAGATTCTTGAAGAGAATCAAGGTTCCATGC  CATAGAATCGGTGACAAAGAAATTCATGTTTTGGGTGACACCAAGTCCGTTGTTTTGTCT  ATGCCAATCAACGAACAATTCAAGAAGGCCGTTTTGAACTAA |
| p*TEF1*_luxO-105 | GCACACACCATAGCTTCAAAATGTTTCTACTCCTTTTTTACTCTTCCAGATTTTCTCGGACTCCGCGCATCGCCGTACCACTTCAAAACACCCAAGCACAGCATACTAAATTTCCCCTCTTTCTTCCTCTAGGGTGTCGTTAATTACCCGTACTAAAGGTTTGGAAAAGAAAAAAGAGACCGCCTCGTTTCTTTTTCTTCGTCGAAAAAGGCAATAAAAATTTTTATCACGTTTCTTTTTCTTGAAAATTTTTTTTTTTGATTTTTTTCTCTTTCGATGACCTCCCATTGATATTTAAGTTAATAAACGGTCTTCACCTGTAGGATCGTACAGGTAATTTCTCAAGTTTCAGTTTCATTTTTCTTGTTCTATTACAACTTTTTTTACTTCTTGCTCATTAGAAAGAAAGCATAGCAATCTAATCTAAGTTTTAATTACAA |

**Table S6: MRM transitions for homoserine lactones quantified by LC-MS/MS.**

| **Analyte** | **Retention Time**  **[min]** | **Q1**  **[*m/z*]** | **Q3 [*m/z*]** | **Fragmentor**  **[V]** | **CE**  **[V]** |
| --- | --- | --- | --- | --- | --- |
| Aloesone | 1.86 | 233.1 | 191.0Qt | 92 | 17 |
| [M+H]+ |  | 233.1 | 151.0 | 92 | 37 |
|  |  | 233.1 | 77.0 | 92 | 49 |
| C4-HSL | 0.85 | 172.1 | 102.1Qt | 53 | 5 |
| [M+H]+ |  | 172.1 | 154.1 | 53 | 5 |
|  |  | 172.1 | 71.0 | 53 | 9 |
| C6-HSL | 1.91 | 200.1 | 102.1Qt | 63 | 5 |
| [M+H]+ |  | 200.1 | 182.1 | 63 | 5 |
|  |  | 200.1 | 71.1 | 63 | 13 |
| C6-oxo-HSL | 1.29 | 214.1 | 102.1Qt | 58 | 5 |
| [M+H]+ |  | 214.1 | 186.1 | 58 | 5 |
|  |  | 214.1 | 74.0 | 58 | 21 |
| C8-HSL | 1.9 | 228.1 | 102.1Qt | 63 | 5 |
| [M+H]+ |  | 228.1 | 210.1 | 63 | 5 |
|  |  | 228.1 | 74.0 | 63 | 21 |
| C8-oxo-HSL | 2.6 | 242.1 | 102.1Qt | 63 | 9 |
| [M+H]+ |  | 242.1 | 141.1 | 63 | 9 |
|  |  | 242.1 | 184.1 | 63 | 9 |
| C10-HSL | 3.13 | 256.1 | 102.1Qt | 78 | 9 |
| [M+H]+ |  | 256.1 | 238.2 | 78 | 5 |
|  |  | 256.1 | 155.1 | 78 | 5 |
| C12-oxo-HSL | 3.24 | 298.1 | 102.1Qt | 82 | 9 |
| [M+H]+ |  | 298.1 | 240.1 | 82 | 9 |
|  |  | 298.1 | 155.1 | 82 | 13 |

Qt = quantifier ion, additional transitions were used for identification. Q = quadrupole. CE = collision energy.
